# Supplementary material for: Eruptions and Social Media: Communication and Public Outreach About Volcanoes and Volcanic Activity in Italy
Source: Frontiers journal article supplement (doi:10.3389/feart.2022.926155), 2022-07-07
Supplement: Table_1.docx [file Table_1.docx]

Eruptions and social media: communication and public outreach about volcanoes and volcanic activity in Italy

**Micol Todesco1*, Maddalena De Lucia2, Emanuela Bagnato2, Boris Behncke3, Alessandro Bonforte3, Gianfilippo De Astis4, Salvatore Giammanco3, Fausto Grassa5, Marco Neri3, Piergiorgio Scarlato4, Augusto Neri6**

**Supplementary material**

**Table S1**. Blog articles describing volcanic eruptions in the world

| **Date of publication** | **Volcano** |
| --- | --- |
| 09 July 2018 | Fuego, Guatemala |
| 09 July 2018 | Hawaii |
| 11 December 2018 | Mayotte, Comoro Islands |
| 09 December 2019 | Whakaari, New Zealand |
| 15 January 2020 | Taal, Philippines |
| 10 March 2020 | Anak Krakatau |
| 20 March and 3 April 2021 | Fagradalsfjall, Iceland |
| 12 April 2021 | Soufrière Saint-Vincent, WI |
| 17 January 2022 | Hunga Tonga – Hunga Ha’apai |

**Table S2**. Blog articles describing famous eruptions

| **Date of publication** | **Volcano, Eruption** |
| --- | --- |
| 20 August 2018 | Vesuvius, AD 79 |
| 16 December 2018 | Vesuvius, 1631 |
| 04 April 2019 | Vesuvius, 1906 |
| 06 June 2019 | Vesuvius, 1929 |
| 18 March 2019 | Vesuvius, 1944 |
| 07 March 2019 | Etna, 1669 |
| 7 November 2018 | Etna, 1928 |
| 12 September 2019 | Etna, 1979 |
| 18 March 2021 | Etna, 1981 |
| 21 December 2021 | Etna, 1991-93 |
| 24 March 2020 | Etna, 2000 |
| 15 November 2019 | Campi Flegrei, 1538 |
| 27 January 2020 | Ferdinandea Island, 1831 |
| 31 March 2020 | Eyjafjallajökull, 2010 |
| 18 May 2020 | Mt. St. Helens, 1980 |
| 31 October 2018 | Tambora, 1815 |

**Table S3**. Blog articles describing various volcanic phenomena or research and monitoring methods

| **Date of publication** | **Topic** |
| --- | --- |
| 13 July 2018 | Is volcanic activity increasing worldwide? |
| 16 July 2018 | Stromboli and its explosions |
| 19 July 2018 | Ever changing Etna’s summit craters |
| 30 July 2018 | Volcanic gases |
| 25 September 2018 | Medusa subaqueous monitoring system |
| 24 October 20218 | Crater lakes |
| 25 December 2018 | Krakatau and Stromboli: Tsunamis of volcanic origin |
| 8 January 2019 | Seismic monitoring at Vesuvius |
| 15 January 2019 | Solfatara’s minerals (Campi Flegrei) |
| 6 March 2019 | Shallow faulting after Mw 4.9 seismic event at Etna on the 26/12/18 |
| 11 June 2019 | Seismicity at Campi Flegrei |
| 17 June 2019 | Rare minerals in Solfatara (Campi Flegrei) |
| 29 July 2019 | New sensors reveal movements on the Pernicana’s fault on Etna |
| 12 August 2019 | Mud volcanoes on Etna |
| 05 September 2019 | Pyroclastic flows above water |
| 13 September 2019 | Cryptotephra: dating geological events in Antarctica |
| 09 October 2019 | Seamounts in the Tyrrhenian Sea |
| 15 October 2019 | Geological history of Campi Flegrei |
| 8 January 2020 | Drones and volcanology |
| 10 March 2020 | How tall is Etna? |
| 26 March 2020 | Etna monitoring never stops |
| 14 April 2020 | Volcanoes and meteorology |
| 19 April 2020 | Fake video: no new craters in Campi Flegrei |
| 21 April 2020 | Lockdown effect on electromagnetic noise at Etna |
| 11 May 2020 | Volcanoes from space |
| 26 May 2020 | Volcanoes source of mercury |
| 8 June 2020 | Sabatini and Albani: sleeping volcanoes near Rome |
| 24 June 2020 | Marsili and Palinuro: precious underwater volcanoes |
| 30 June 2020 | New eyes on Stromboli: summit thermal camera installed |
| 30 June 2020 | Rotational sensors to detect ground motion |
| 2 July 2020 | Gas emissions on Colli Albani |
| 3 July 2020 | Overflight on Etna |
| 16 October 2020 | Stromboli’s memory |
| 22 October 2020 | Geological mapping of Vulcano |
| 26 October 2020 | The eruption that disrupted Maya civilization |
| 4 November 2020 | Experiments and simulation to predict volcanic hazard |
| 21 December 2020 | Geochemical surveillance of Campanian volcanoes |
| 22-25 January | Historical eruptions at Etna |
| 9 February 2021 | Overflight to map Etna’s lava flow |
| 22 February 2021 | Lapilli and ashes: Etna’s magma has no secrets |
| 1 March 2021 | “Confetti” in the Roman theatre of Herculaneum |
| 26 March 2021 | Osservatorio Vesuviano’s seismic databases |
| 31 March 2021 | Where ash brings you: modelling fallout at Etna |
| 1 April 2021 | A day in the field with INGV researchers |
| 5 May 2021 | Campi Flegrei, natural lab to study calderas |
| 12 May 2021 | Ash fallout: a management problem |
| 27 May 2021 | Vesuvius augite crystals |
| 10 June 2021 | Noble gases and their messages |

**Table S4**. Blog articles about volcanology and art

| **Date of publication** | **Topic** |
| --- | --- |
| 20 July 2018 | Stromboli and neorealist cinema |
| 06 September 2018 | The volcano between art and science |
| 31 October 2018 | The year without a summer when Frankenstein was born |
| 5 November 2018 | The Aeolian Island in the Fifties cinema |
| 24 December 2018 | Vision of the Earth: Artistic perspectives on Earth dynamics |
| 21 May 2021 | Talking volcanoes: a comic stripe dedicated to Etna and Stromboli |
| Summer 2021 | Prodigies (a story in 4 sections) |
